# Supplementary material for: Study of Mycobacterium tuberculosis Complex Genotypic Diversity in Malaysia Reveals a Predominance of Ancestral East-African-Indian Lineage with a Malaysia-Specific Signature
Source: PLoS One. 2014 Dec 11;9(12):e114832. doi: 10.1371/journal.pone.0114832 (PMC4263714; doi:10.1371/journal.pone.0114832)
Supplement: Table S1 — Detailed results obtained including demographic, epidemiologic, drug-resistance, and genotyping information on a total of 220 M. tuberculosis strains isolated from patients residing in Kelantan (n = 184 strains) and Kuala Lumpur (n = 36), Malaysia. a Note that for orphan spoligotype patterns (n = 22 strains marked as Or01-Or22, highlighted in blue), lineages were assigned manually by Expert-based interpretations using SITVITWEB rules. b Note that SITs followed by an asterisk (n = 6 patterns containing 11 strains, highlighted in yellow) indicate "newly created shared-types" due to 2 or more strains belonging to an identical new pattern within this study or after a match with an orphan in the database; SIT designations followed by number of strains: 3993* this study n = 1, MYS n = 1; 3994* this study n = 2, MYS n = 1; 3995* this study n = 2; 3996* this study n = 2; 3997* this study n = 2; 3998* this study n = 2. c Drug resistance code; “0” for unknown; “1” for strain susceptible to all first-line drugs; “2” for MDR-TB (combined resistance to INH-RIF); “3” for any other resistances (followed by the name of the drugs: STR, Streptomycin; INH, Isoniazid; RIF, Rifampin; ETB, Ethambutol; PZA, Pyrazinamide). (PDF) [file pone.0114832.s001.pdf]

**Supplemental Table S1.** Detailed results obtained including demographic, epidemiologic, drug-resistance, and genotyping information on a total of 220 *M. tuberculosis* strains isolated from patients residing in Kelantan (n=184 strains) and Kuala Lumpur (n=36), Malaysia.

[illegible]

[illegible]

[illegible]

[illegible]

<sup>a</sup> Note that for orphan spoligotype patterns (n=22 strains marked as Or01-Or22, highlighted in blue), lineages were assigned manually by Expert-based interpretations using SITVITWEB rules.

<sup>b</sup> Note that SITs followed by an asterisk (n=6 patterns containing 11 strains, highlighted in yellow) indicate "newly created shared-types" due to 2 or more strains belonging to an identical new pattern within this study or after a match with an orphan in the database; SIT designations followed by number of strains: 3993\* this study n=1, MYS n=1; 3994\* this study n=2, MYS n=1; 3995\* this study n=2; 3996\* this study n=2; 3997\* this study n=2; 3998\* this study n=2.

<sup>c</sup> Drug resistance code; “0” for unknown; “1” for strain susceptible to all first-line drugs; “2” for MDR-TB (combined resistance to INH-RIF); “3” for any other resistances (followed by the name of the drugs: STR, Streptomycin; INH, Isoniazid; RIF, Rifampin; ETB, Ethambutol; PZA, Pyrazinamide).
